# Supplementary material for: Cardiomyocyte Differentiation from Mouse Embryonic Stem Cells by WNT Switch Method
Source: MDPI journal article supplement (doi:10.3390/cells13020132), 2024-01-11
Supplement: s1 [file s1]

Table s1: RT-qPCR primers used in study

| <i>Primer Name</i> | <i>Strand</i> | <i>Sequence</i>                   |
|--------------------|---------------|-----------------------------------|
| <i>Nanog</i>       | F             | ACC TGA GCT ATA AGC AGG TTA AGA C |
| <i>Nanog</i>       | R             | GTG CTG AGC CCT TCT GAA TCA GAC   |
| <i>Oct3/4</i>      | F             | GTT CTC TTT GGA AAG GTG TTC AGC   |
| <i>Oct3/5</i>      | R             | ATC TCC TGA AGG TTC TCA TTG TTG T |
| <i>Brachyury</i>   | F             | CTGTGACTGCCTACCAGAATGAGGAG        |
| <i>Brachyury</i>   | R             | GGTCGTTTCTTTCTTTGGCATCAAG         |
| <i>Wnt3</i>        | F             | CCGCTTCTGTCTAGGGTCTG              |
| <i>Wnt3</i>        | R             | GGTAGAGAGTGCAGGCAAGG              |
| <i>Gata4</i>       | F             | CTCTATCACAAGATGAACGGCATCAAC       |
| <i>Gata4</i>       | R             | TCTGGCAGTTGGCACAGGAGAG            |
| <i>Lhx1</i>        | F             | CCTGGACCGCTTTCTCTTGAA             |
| <i>Lhx1</i>        | R             | ACCGAAACACCGGAAGAAGTC             |
| <i>cTnT</i>        | F             | GAGGAGGTGGTGGAGGAGTA              |
| <i>cTnT</i>        | R             | GGCTTCTTCATCAGGACCAA              |
| <i>Myh6</i>        | F             | GATGGCACAGAAGATGCTGA              |
| <i>Myh6</i>        | R             | CTGCCCCTTGGTGACATACT              |
| <i>Nkx2.5</i>      | F             | CCACTCTCTGCTACCCACCT              |
| <i>Nkx2.5</i>      | R             | CCAGGTTTCAGGATGTCTTTGA            |
| <i>Gapdh</i>       | F             | CAAAATGGTGAAGGTCGGTGTGAA          |
| <i>Gapdh</i>       | R             | CAACAATCTCCACTTTGCCACTG           |
